# Supplementary material for: Genetic alterations of KRAS and TP53 in intrahepatic cholangiocarcinoma associated with poor prognosis
Source: PubMed Central journal article supplement (PMC10358752; doi:10.1515/biol-2022-0652), 2023-07-17
Supplement: biol-2022-0652-sm.pdf [file biol-2022-0652-sm.pdf]

# Supplementary material

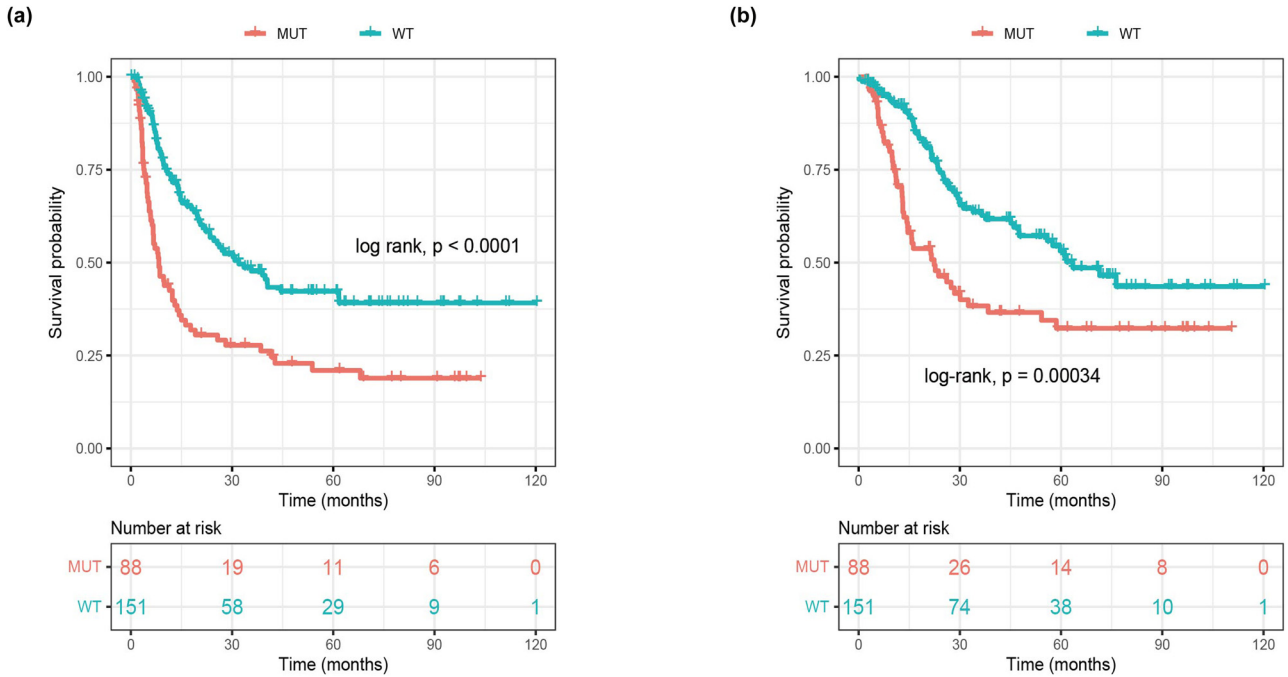

**Figure S1:** Prognosis of ICCA with *KRAS* and/or *TP53* from ICGC database. (a) Progressive free survival (PFS) and (b) overall survival (OS) of all patients stratified by *TP53* and/or *KRAS* mutation versus wild type (MUT vs WT).

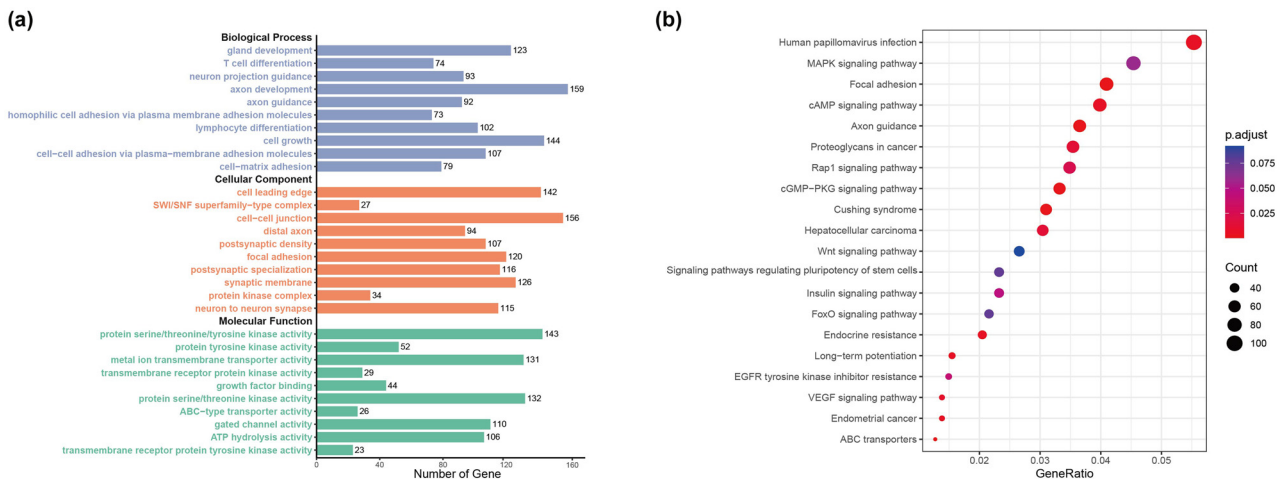

**Figure S2:** GO and KEGG pathway enrichment analysis of patients with ICCA from TCGA database. (a) GO term enrichment of biological process, cellular component, and molecular function. (b) Top mutated KEGG pathways in the ICCA.

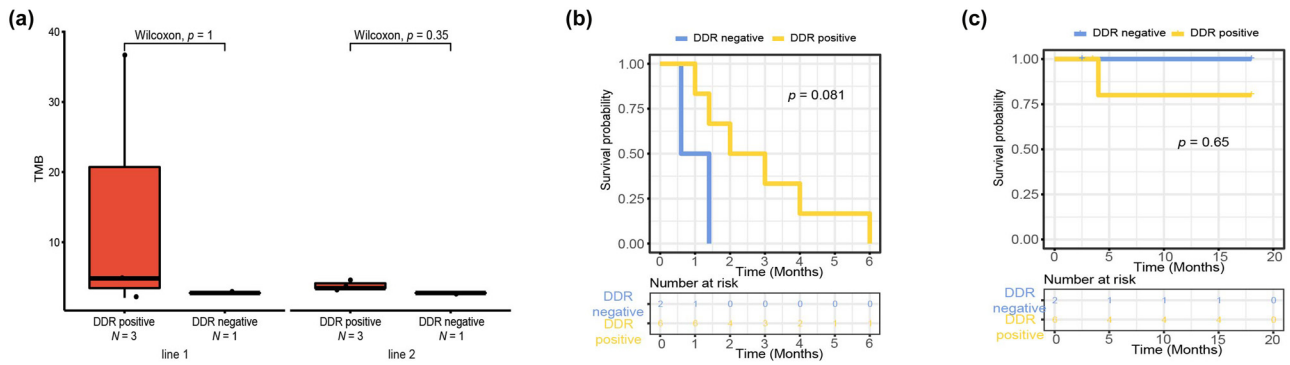

**Figure S3:** DRR pathway alteration status in ICCA patients treated by immune checkpoint inhibitor (ICI). (a) Patients with positive DRR had a higher TMB compared with patients with negative DRR both in line 1 and 2 of ICI treatment. (b) (PFS and (c) OS of all patients stratified by DDR positive versus negative was shown in patients treated with ICI.

**Table S1:** Prognosis of *KRAS* & *TP53* mutations in ICCA patients treated with ICI

|                                     | Patient number (N = 12) | Median PFS (Months) | Median OS (Months) | P value (PFS) | P value (OS) |
|-------------------------------------|-------------------------|---------------------|--------------------|---------------|--------------|
| <i>KRAS</i> & <i>TP53</i> mutations | 5                       | 1.4                 | 4                  | 0.76          | 0.17         |
| Wild type                           | 3                       | 3                   | 18                 |               |              |

**Table S2:** Associations between patients with *KRAS* & *TP53* mutation and TMB, and clinical characteristics

| Feature     | Group                | <i>P</i> value ( <i>KRAS</i> & <i>TP53</i> mutations vs wild type) | <i>P</i> value (TMB high vs TMB low) |
|-------------|----------------------|--------------------------------------------------------------------|--------------------------------------|
| Age         | ≥64 years            | 0.5581                                                             | 1                                    |
|             | <64 years            |                                                                    |                                      |
| TNM stage   | I–II                 | 0.2929                                                             | 1                                    |
|             | III–IV               |                                                                    |                                      |
| Metastasis  | Yes                  | 0.5758                                                             | 0.5758                               |
|             | No                   |                                                                    |                                      |
| Origin site | Left                 | 0.5227                                                             | 0.2045                               |
|             | Right                |                                                                    |                                      |
| Tumor size  | ≥180 cm <sup>3</sup> | 1                                                                  | 0.5671                               |
|             | <180 cm <sup>3</sup> |                                                                    |                                      |
| PD-L1       | Positive             | 1                                                                  | 0.4444                               |
|             | Negative             |                                                                    |                                      |
| OS          | ≥18 months           | 0.2222                                                             | 0.5758                               |
|             | <18 months           |                                                                    |                                      |
| TMB         | ≥2.76 mutations/Mb   | 0.2929                                                             | —                                    |
|             | <2.76 mutations/Mb   |                                                                    |                                      |

**Table S3:** Univariate Cox model analysis between the top 20 mutated genes and overall survival

| Genes         | Hazard ratio | <i>P</i> value |
|---------------|--------------|----------------|
| <i>ACVR1B</i> | −19.1681     | 0.999649       |
| <i>APC</i>    | −19.36       | 0.999517       |
| <i>ARID1A</i> | 23.04216     | 0.999635       |
| <i>ARID2</i>  | −19.36       | 0.999517       |
| <i>ATM</i>    | −19.36       | 0.999517       |
| <i>CTNNB1</i> | −19.36       | 0.999517       |
| <i>DNMT1</i>  | −19.1681     | 0.999649       |
| <i>FGFR2</i>  | −19.1681     | 0.999649       |
| <i>GNAS</i>   | −19.1681     | 0.999649       |
| <i>KRAS</i>   | 29.00064     | 0.999965       |
| <i>PBRM1</i>  | −19.36       | 0.999517       |
| <i>PIK3CA</i> | −19.36       | 0.999517       |
| <i>RASA1</i>  | −19.1681     | 0.999649       |
| <i>RBM10</i>  | −19.36       | 0.999517       |
| <i>RUNX1</i>  | 23.04216     | 0.999635       |
| <i>SMAD4</i>  | 29.00064     | 0.999965       |
| <i>SUFU</i>   | −19.1681     | 0.999649       |
| <i>TP53</i>   | 22.46062     | 0.999637       |
